# Supplementary material for: Targeted Mutations in the Fusion Peptide Region of La Crosse Virus Attenuate Neuroinvasion and Confer Protection against Encephalitis
Source: MDPI journal article supplement (doi:10.3390/v14071464), 2022-07-02
Supplement: s1 [file s1]

## Supplemental Table S1

[illegible]
